# Supplementary material
Source: Springer Nature journal article supplement (https://www.springermedizin.de/resource/supplementary/12935_2011_294_MOESM4_ESM.pdf/9540246)

UVA  
3x8 J/cm<sup>2</sup>

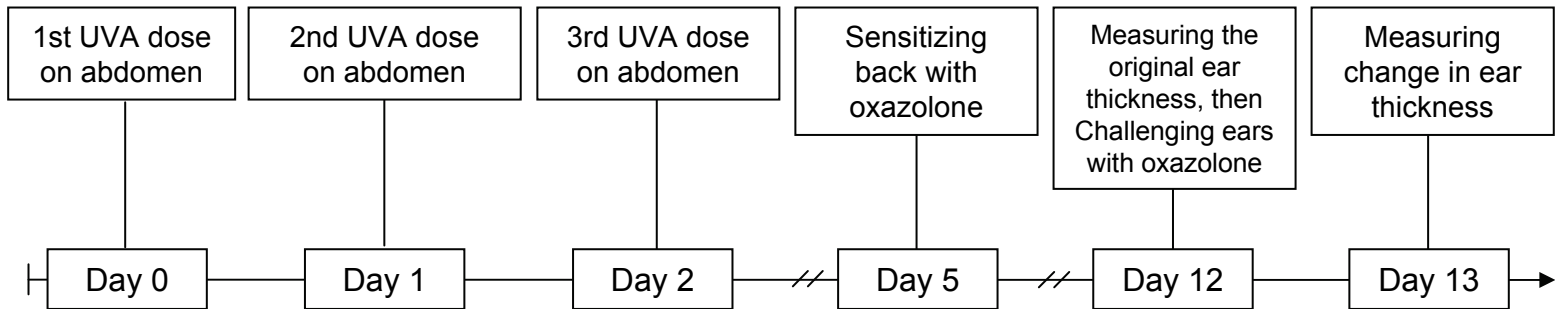

UVA  
8 J/cm<sup>2</sup>

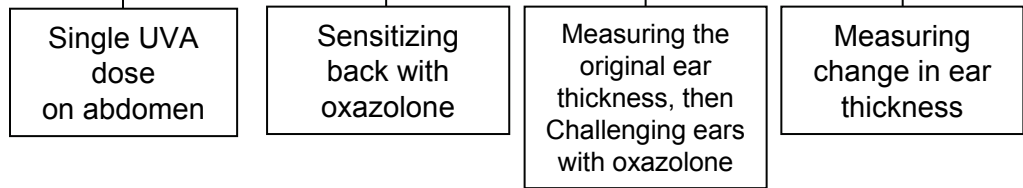

Supplement: MOESM4 [file 9540246]
